# Supplementary material for: Engineering yolk–shell P-doped NiS2/C spheres via a MOF-template for high-performance sodium-ion batteries
Source: Royal Society of Chemistry journal article supplement (doi:10.1039/d0ta02568b), 2020-01-01
Supplement: d0ta02568b1.pdf [file d0ta02568b1.pdf]

Electronic Supplementary Information for

## Engineering yolk-shell P-doped NiS<sub>2</sub>/C spheres via MOFs template for high-performance sodium-ion batteries†

Liqin Wang,<sup>a</sup> Zhanli Han,<sup>a</sup> Quanqing Zhao,<sup>a</sup> Xiuyun Yao,<sup>a</sup> Youqi Zhu,<sup>\*a</sup> Xilan Ma,<sup>a</sup> Shide Wu,<sup>b</sup> and Chuanbao Cao<sup>\*a</sup>

<sup>a</sup> Research Center of Materials Science, Beijing Key Laboratory of Construction Tailorable Advanced Functional Materials and Green Applications, Beijing Institute of Technology, Beijing 100081, China, E-mail: yqzhu@bit.edu.cn (Y. Zhu), cbcao@bit.edu.cn (C. Cao).

<sup>b</sup> Henan Provincial Key Laboratory of Surface and Interface Science, Zhengzhou University of Light Industry, Zhengzhou 450001, China.

### Experimental details

#### Synthesis of Ni-MOFs

In a typical procedure,<sup>1</sup> 0.15 g trimesic acid, 1.0325 g polyvinylpyrrolidone (PVP M=58000, K29-32) and 0.432 g Ni(NO<sub>3</sub>)<sub>2</sub>·6H<sub>2</sub>O were dissolved in mixed solvent of 15 mL distilled water and 15 mL N,N-dimethylformamide (DMF). After vigorous stirring for 1 h, the homogeneous mixed solution transferred to 50 mL Teflon-lined autoclave and kept in oven under 160 °C for 12 h. The prepared product was washed several times by distilled water and absolute ethanol, and then dried at 80 °C to obtain the yolk-shell Ni-MOFs spheres.

#### Synthesis of yolk-shell NiS<sub>2</sub> spheres

The 0.1 g Ni-MOFs and 2 g sulfur powder were put in two quartz boats, where the Ni-MOFs and S powder were placed at the middle and upstream of the tube furnace, respectively. They were heated under argon atmosphere at 350 °C for 2 h with a heating rate of 1 °C min<sup>-1</sup>. The final NiS<sub>2</sub> sample with yolk-shell structure was obtained after cooling down to room temperature.

#### Synthesis of P-doped Ni-MOFs samples

The synthetic procedure was as same as above, 0.15 g trimesic acid, 1.0325 g polyvinylpyrrolidone (PVP M=58000, K29-32) and 0.432 g Ni(NO<sub>3</sub>)<sub>2</sub>·6H<sub>2</sub>O were dissolved in mixed solvent of 15 mL distilled water and 15 mL N,N-dimethylformamide (DMF), then added certain amounts of phytic acid (0.01mL, 0.03mL, 0.05 mL and 0.08 mL) with vigorous stirring for 1 h. After transferred to Teflon-lined autoclave and kept at 160 °C for 12 h, the product of P-doped Ni-MOFs samples were collected after washed and dried.

#### Synthesis of P-doped yolk-shell NiS<sub>2</sub>/C spheres

Similarly, the above prepared P-doped Ni-MOFs and sulfur powder were heated in tube furnace by a mass ratio of 1:20 under argon atmosphere at 350 °C for 2 h to acquire P-doped NiS<sub>2</sub>/C samples, the NiS<sub>2</sub>/C samples with different amount of phytic acid are labeled as 0.01P-doped NiS<sub>2</sub>/C, 0.03P-doped NiS<sub>2</sub>/C, 0.05P-doped NiS<sub>2</sub>/C and 0.08P-doped NiS<sub>2</sub>/C, respectively.

#### Synthesis of NiS<sub>2</sub> particles

0.582 g Ni(NO<sub>3</sub>)<sub>2</sub>·6H<sub>2</sub>O, 0.5 mL ethylenediamine and 0.8 mL CS<sub>2</sub> were dissolved into 35 mL distilled water. After vigorous stirring for 30 min, the mixed solution transferred to 50 mL Teflon-lined autoclave and maintained at 180 °C for 12 h. Then black sample was washed and dried to

produce NiS<sub>2</sub> particles.

### **Materials characterization**

The crystal phases and crystallinity of synthesized samples were determined by X-ray diffraction (XRD) with PANalytical X-pert diffractometer (Netherlands) using Cu-K $\alpha$  radiation ( $\lambda=0.15418$  nm). The valence states of elements on the surface were characterized through X-ray photoelectron spectroscopy (XPS, PHI Quantera II) with Al K $\alpha$  source (1486.6 eV). The micromorphologies and elements distribution were surveyed by field-emission scanning electron microscopy (FESEM, Hitachi S-4800) with energy-dispersive X-ray spectroscopy (EDS, EDAX, PW9900). The microstructures and elemental mappings were observed by high-resolution transmission electron microscopy (HRTEM, JSM-2100F) with 200 kV operating voltage. The specific surface area and pore size distribution were measured by the N<sub>2</sub> adsorption-desorption tester (NOVA 4200e, Quantachrome Instruments, USA) employs on the Brunauer-Emmett-Teller (BET) method and Barrett-Joyner-Halenda (BJH) model.

### **Electrochemical test**

The electrochemical properties measurements were implemented at room temperature using CR 2025 coin-type cell. The work electrodes consisting of active material, super P and polyvinylidene fluoride (PVDF) in N-Methyl-2-pyrrolidone (NMP) with a mass ration of 7:2:1 were assembled in glovebox, where the concentrations of O<sub>2</sub> and H<sub>2</sub>O were limited below 0.01 ppm. The quality of active materials coated on carbon paper (current collector) was roughly 1.5 mg with the areal mass loading of 0.97 mg cm<sup>-2</sup>. The metallic sodium and Whatman glass fiber were used as the counter electrode and separator, respectively. 1 M NaClO<sub>4</sub> dissolved into ethylene carbonate (EC) and dimethyl carbonate (DMC) (1:1 volume ratio) with 5 wt% fluoroethylene carbonate (FEC). The galvanostatic charge and discharge measurements were carried out by using Land battery system (LAND CT2001A) at different current densities of 0.1 to 2 A g<sup>-1</sup> with the voltage of 0.05-3 V. Cyclic voltammetry (CV) tests were conducted on electrochemical workstation (CHI 660E, Chen-hua) at various sweep speeds of 0.1 to 1 mV s<sup>-1</sup>. Electrochemical impedance spectroscopy (EIS) was executed on same electrochemical workstation with an appropriate AC voltage amplitude of 5 mV corresponding to frequency range of 10<sup>5</sup>-10<sup>-2</sup> Hz.

Supplementary figures and tables

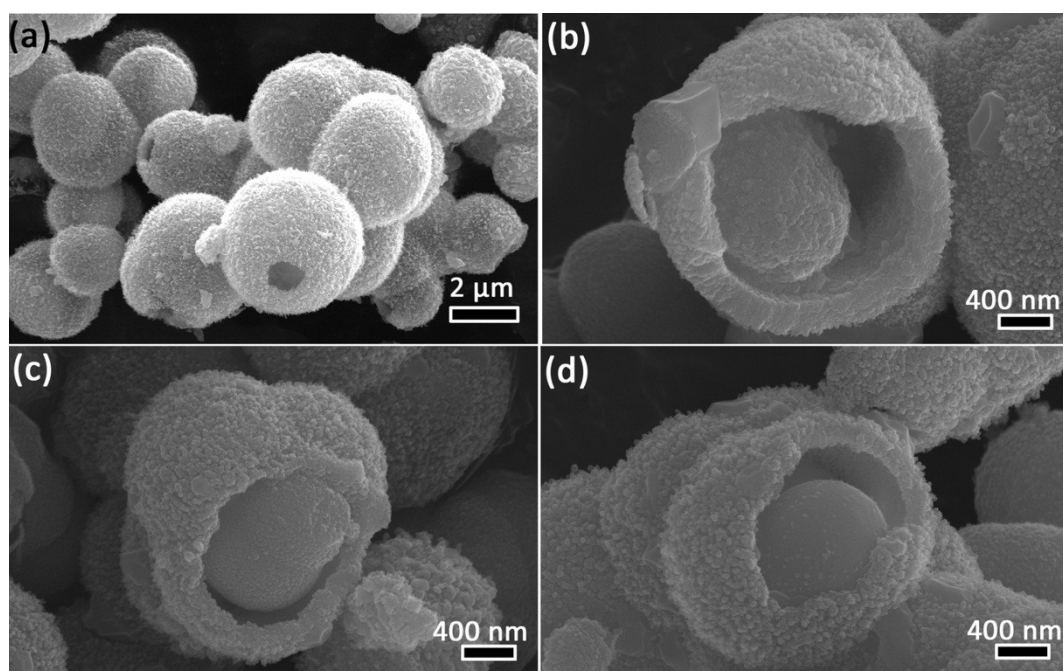

Fig. S1 FESEM images of (a) yolk-shell NiS<sub>2</sub>/C spheres, P-doped NiS<sub>2</sub>/C spheres with different amount of phytic acid (b) 0.01 mL, (c) 0.05 mL and (d) 0.08 mL.

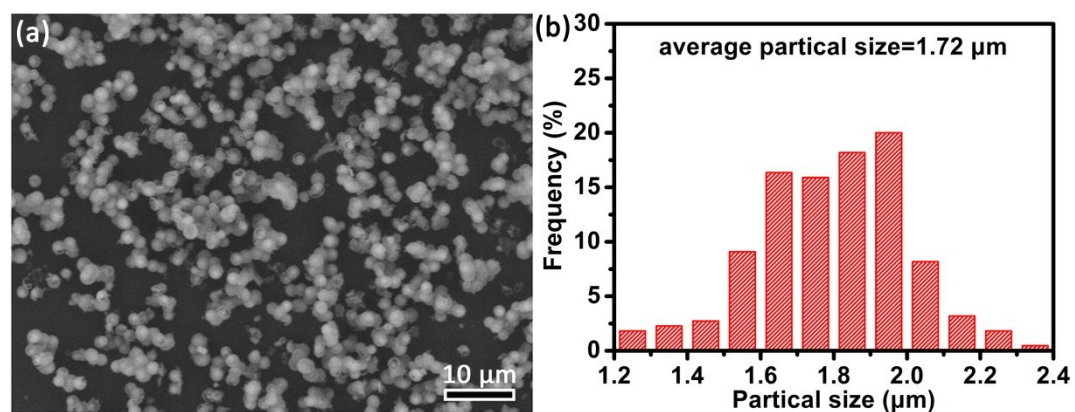

Fig. S2 (a) The low-resolution SEM image and (b) corresponding particle size distribution of 0.03P-doped NiS<sub>2</sub>/C sample.

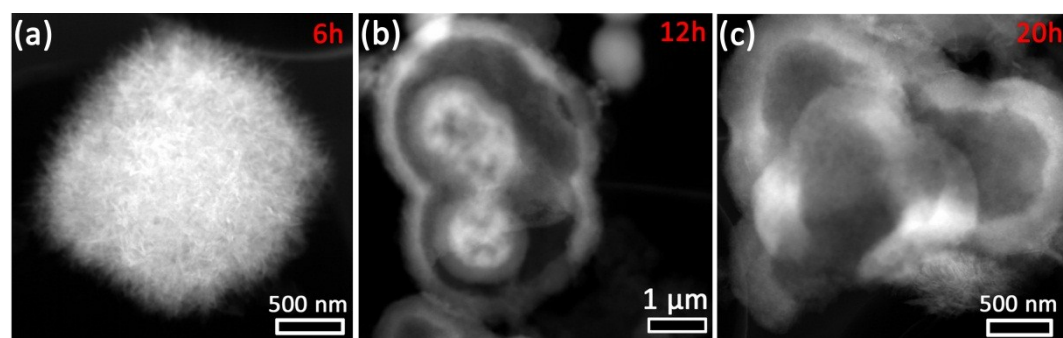

Fig. S3 HAADF-STEM images of corresponding actual morphologies of Ni-MOFs: (a) flower-shaped solid, (b) yolk-shell sphere and (c) hollow sphere.

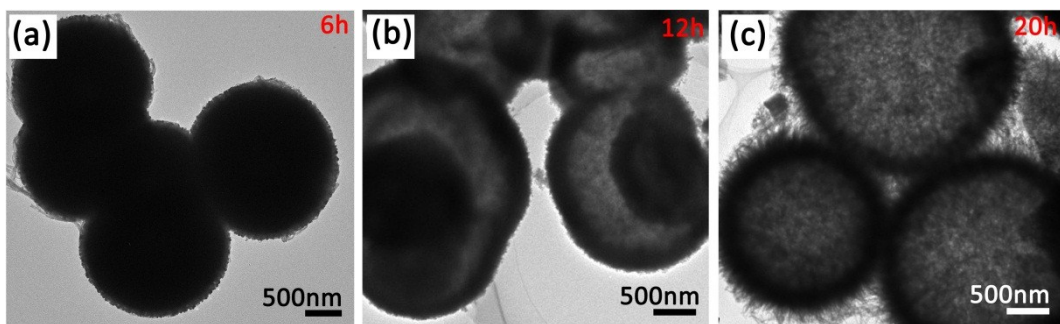

Fig. S4 TEM images of  $\text{NiS}_2$  spheres at different synthetic times: (a) solid sphere, (b) yolk-shell sphere and (c) hollow sphere.

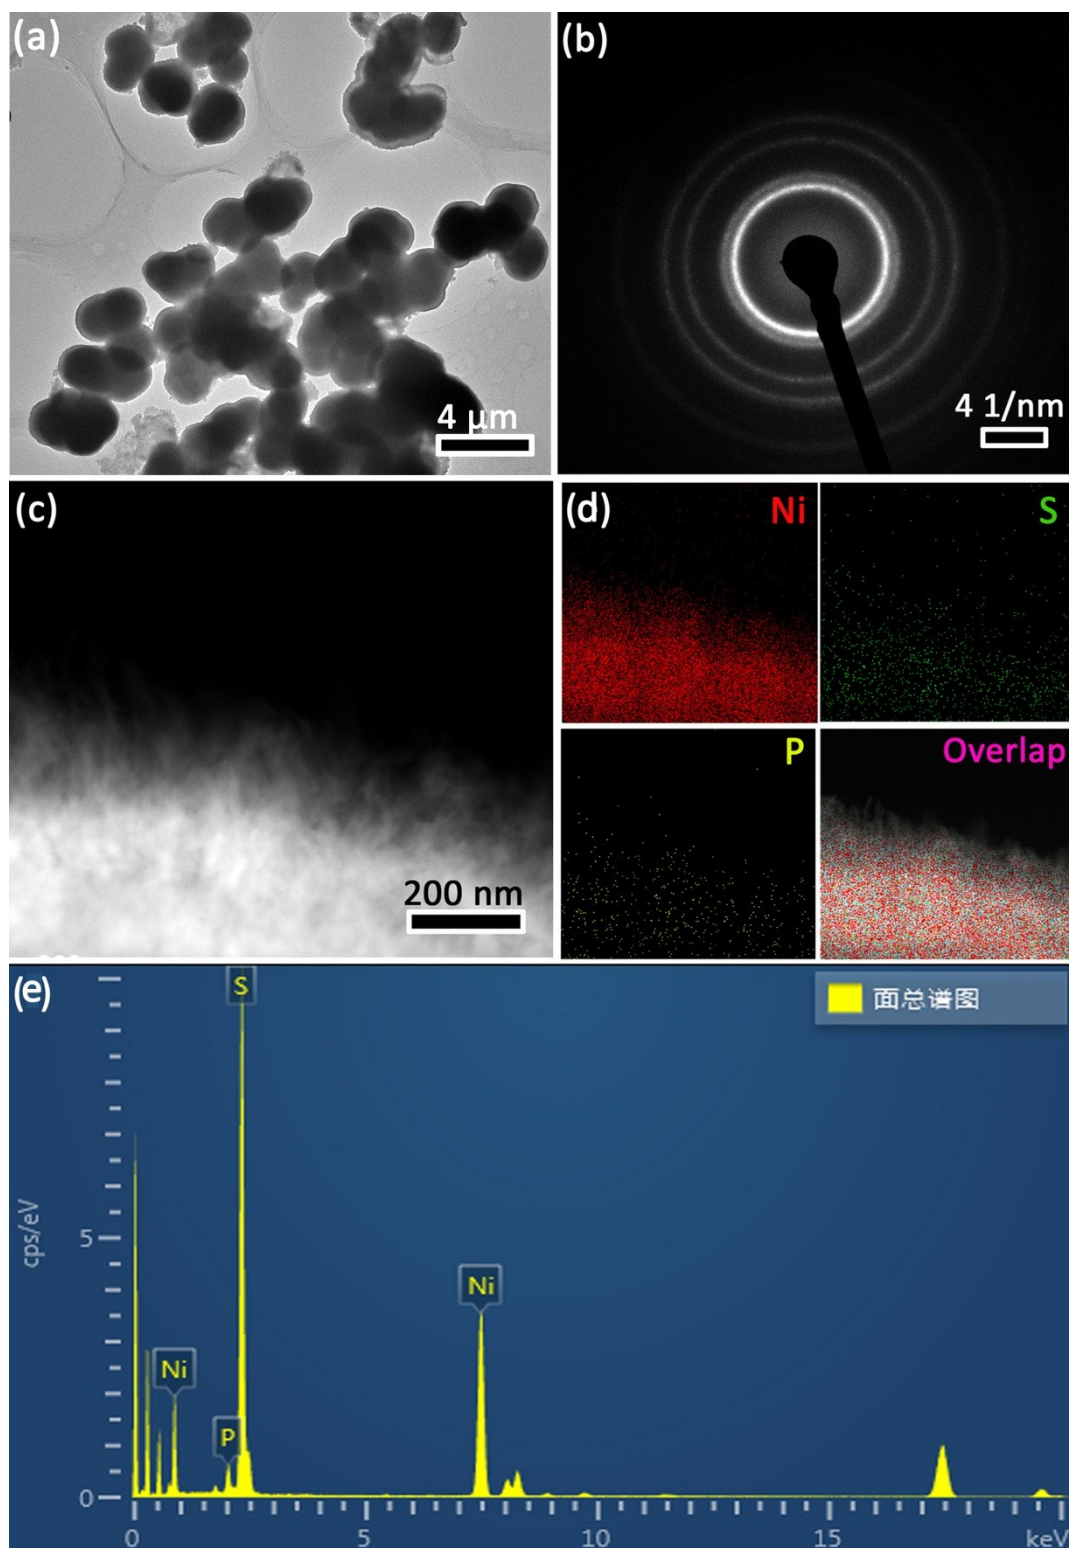

Fig. S5 The low-resolution TEM image (a) and (b) SAED of Ni-MOFs spheres; STEM image (c) of the edge texture and corresponding elemental mapping (d) of Ni, S and P species, and EDS (e) of yolk-shell 0.03P-doped NiS<sub>2</sub>/C spheres.

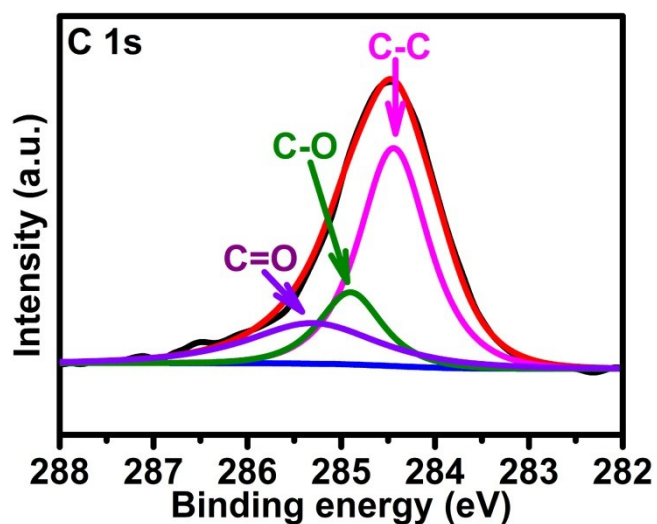

Fig. S6 High-resolution C 1s XPS spectra of 0.03P-doped NiS<sub>2</sub>/C spheres.

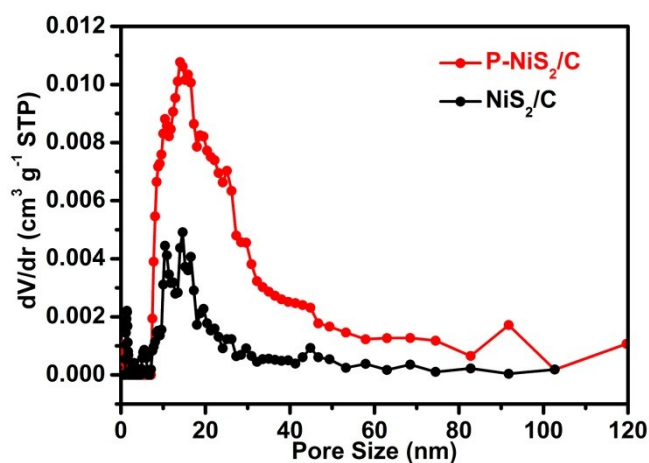

Fig. S7 BJH pore-size distributions of yolk-shell NiS<sub>2</sub>/C and 0.03P-doped NiS<sub>2</sub>/C spheres.

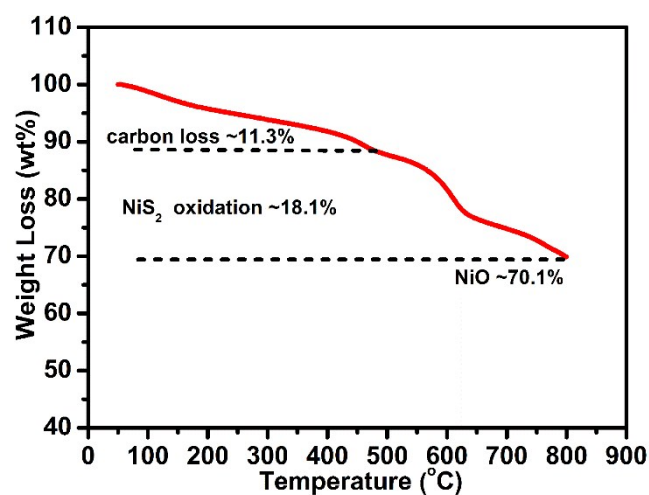

Fig. S8 TGA curve of 0.03P-doped NiS<sub>2</sub>/C sample.

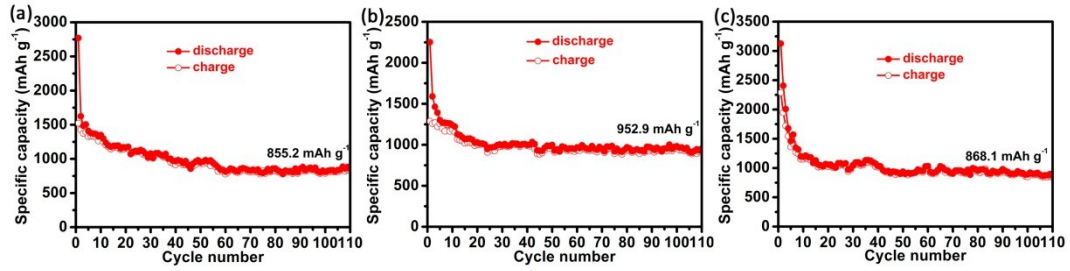

Fig. S9 Cycling performances of (a) 0.01P-doped NiS<sub>2</sub>/C spheres, (b) 0.05P-doped NiS<sub>2</sub>/C spheres, and (c) 0.08P-doped NiS<sub>2</sub>/C spheres at 0.1 A g<sup>-1</sup> after 110 cycles.

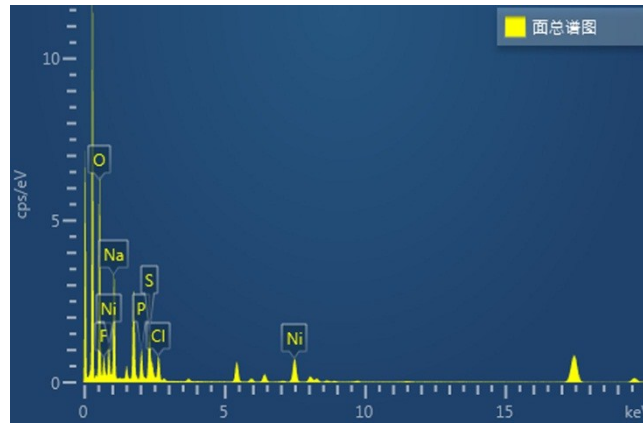

Fig. S10 The corresponding EDS of the long-term cycled 0.03P-doped NiS<sub>2</sub>/C spheres.

Table S1 Comparison of sodium storage performances for NiS<sub>x</sub>-based materials in previous reported literatures.

| materials                         | current density (A g <sup>-1</sup> ) | cycle number | specific capacity (mAh g <sup>-1</sup> ) | references |
|-----------------------------------|--------------------------------------|--------------|------------------------------------------|------------|
| 0.03P-doped NiS <sub>2</sub> /C   | 0.1                                  | 110          | 1113.5                                   | our work   |
| 0.03P-doped NiS <sub>2</sub> /C   | 0.5                                  | 400          | 766.8                                    | our work   |
| NiS <sub>2</sub> /C               | 0.1                                  | 110          | 706.4                                    | our work   |
| NiS <sub>2</sub> -GNS             | 0.0807                               | 200          | 407                                      | 2          |
| NiS <sub>2</sub>                  | 0.1                                  | 100          | 692                                      | 3          |
| NiS <sub>2</sub>                  | 0.5                                  | 1000         | 319                                      | 3          |
| NiS <sub>2</sub>                  | 0.1                                  | 100          | 848                                      | 1          |
| NiS <sub>2</sub> /PCF             | 0.087                                | 100          | 679                                      | 4          |
| NiS <sub>2</sub> /NC              | 0.1                                  | 100          | 505.7                                    | 5          |
| NiS <sub>2</sub> /NC              | 0.5                                  | 300          | 356.2                                    | 5          |
| NiS <sub>2</sub> NP/p-CNF         | 0.1                                  | 100          | 500                                      | 6          |
| NiS <sub>2</sub> @C@C             | 0.1                                  | 100          | 580.8                                    | 9          |
| NiS <sub>x</sub> /CNT@C           | 0.1                                  | 200          | 340                                      | 7          |
| Ni <sub>3</sub> S <sub>2</sub> /C | 0.1                                  | 100          | 453                                      | 8          |

## Notes and references

1. R. Bi, C. Zeng, H. Huang, X. Wang and L. Zhang, *J. Mater. Chem. A*, 2018, **6**, 14077–14082.
2. R. Sun, S. Liu, Q. Wei, J. Sheng, S. Zhu, Q. An and L. Mai, *Small*, 2017, **13**, 1–8.
3. Q. Chen, S. Sun, T. Zhai, M. Yang, X. Zhao and H. Xia, *Adv. Energy Mater.*, 2018, **8**, 1–9.
4. G. Zhao, Y. Zhang, L. Yang, Y. Jiang, Y. Zhang, W. Hong, Y. Tian, H. Zhao, J. Hu, L. Zhou, H. Hou, X. Ji and L. Mai, *Adv. Funt. Mater.*, 2018, **28**, 1803690.
5. J. Li, J. Li, D. Yan, S. Hou, X. Xu, T. Lu, Y. Yao, W. Mai and L. Pan, *J. Mater. Chem. A*, 2018, **6**, 6595–6605.
6. W. Zhao, S. Ci, X. Hu, J. Chen and Z. Wen, *Nanoscale*, 2019, **11**, 4688–4695.
7. X. Zhao, H.-E. Wang, R.C. Massé, J. Cao, J. Sui, J. Li, W. Cai and G. Cao, *J. Mater. Chem. A*, 2017, **5**, 7394–7402.
8. T. Wang, P. Hu, C. Zhang, H. Du, Z. Zhang, X. Wang, S. Chen, J. Xiong and G. Cui, *ACS Appl. Mater. Interfaces*, 2016, **8**, 7811–7817.
9. F. Zhao, Q. Gong, B. Traynor, D. Zhang, J. Li, H. Ye, F. Chen, N. Han, Y. Wang, X. Sun and Y. Li, *Nano Res.* 2016, **9**, 3162–3170.
